# Supplementary material
Source: PubMed Central journal article supplement (PMC5912890)

## Supplementary Figures

**Supplementary Figure 1.** Boxplot of the RSV-infected samples prediction performance on the validation set samples applying the PLS-DA (red), RF (green), and SVM (blue) models over different time points (5h, 24h, 48h and 72h).

**Supplementary Figure 2.** Third clusters obtaining by k-Means Clustering analysis of the difference between infected and uninfected cell cultures for the remaining 84 features in the RSV models.

**Supplementary Figure 3.** Boxplot of the IAV-infected samples prediction performance on the validation set samples applying the PLS-DA (red), RF (green), and SVM (blue) models over different time points (5 h, 24 h, 48 h and 72 h).

**Supplementary Figure 4.** Fourth clusters obtaining by k-Means Clustering analysis of the difference between infected and uninfected cell cultures for the remaining 59 features in the IAV models.

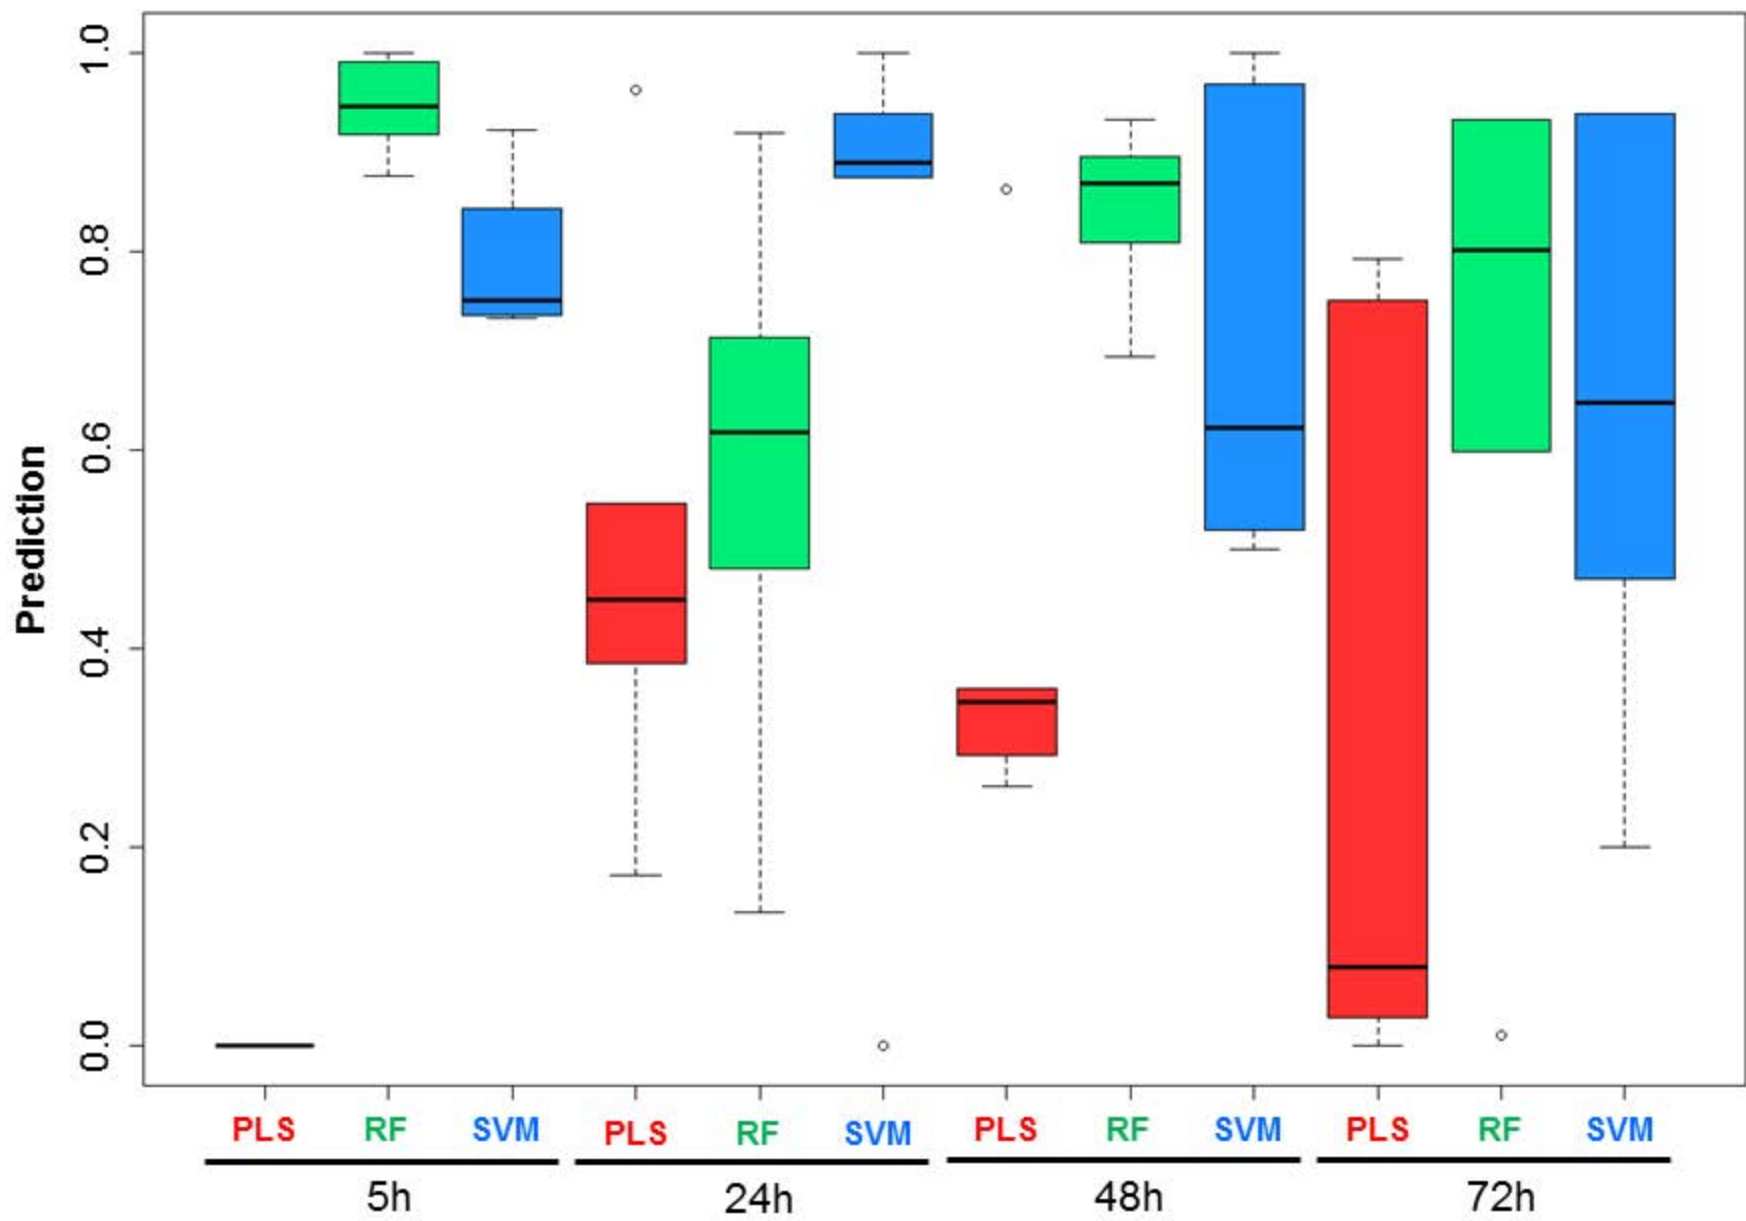

Cluster III

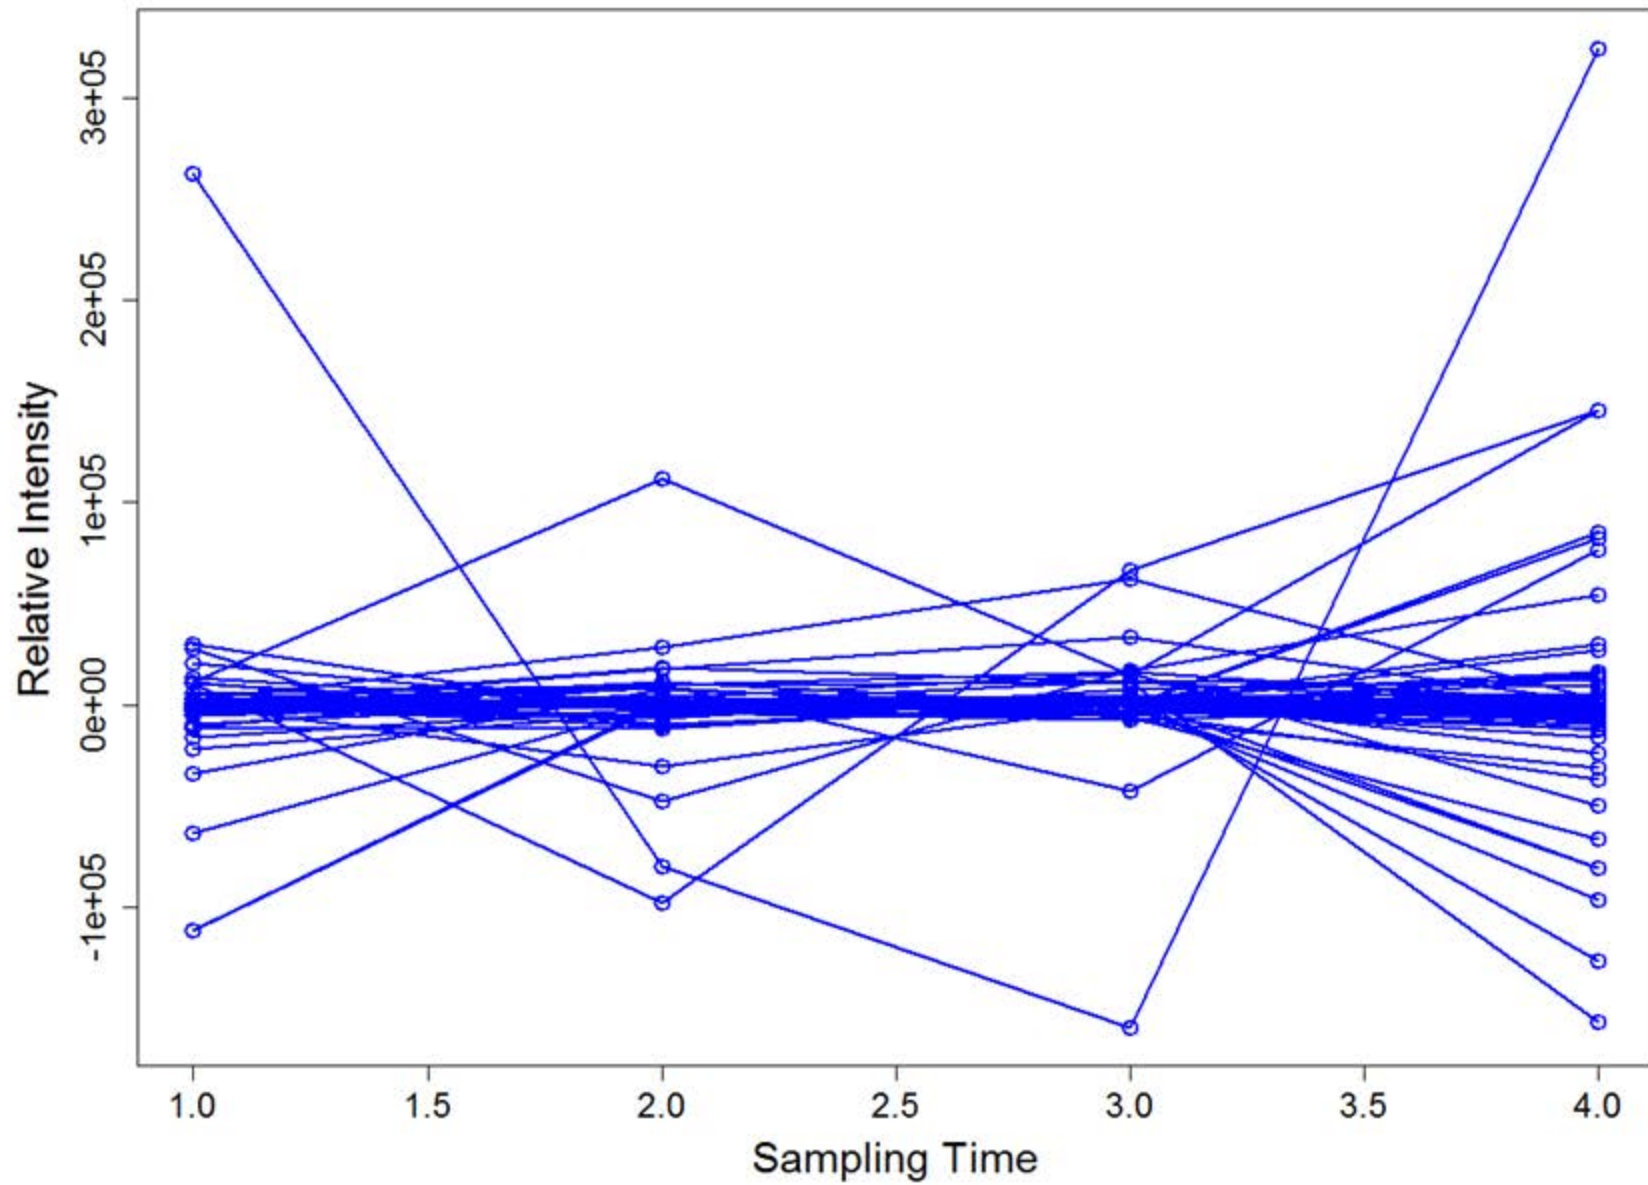

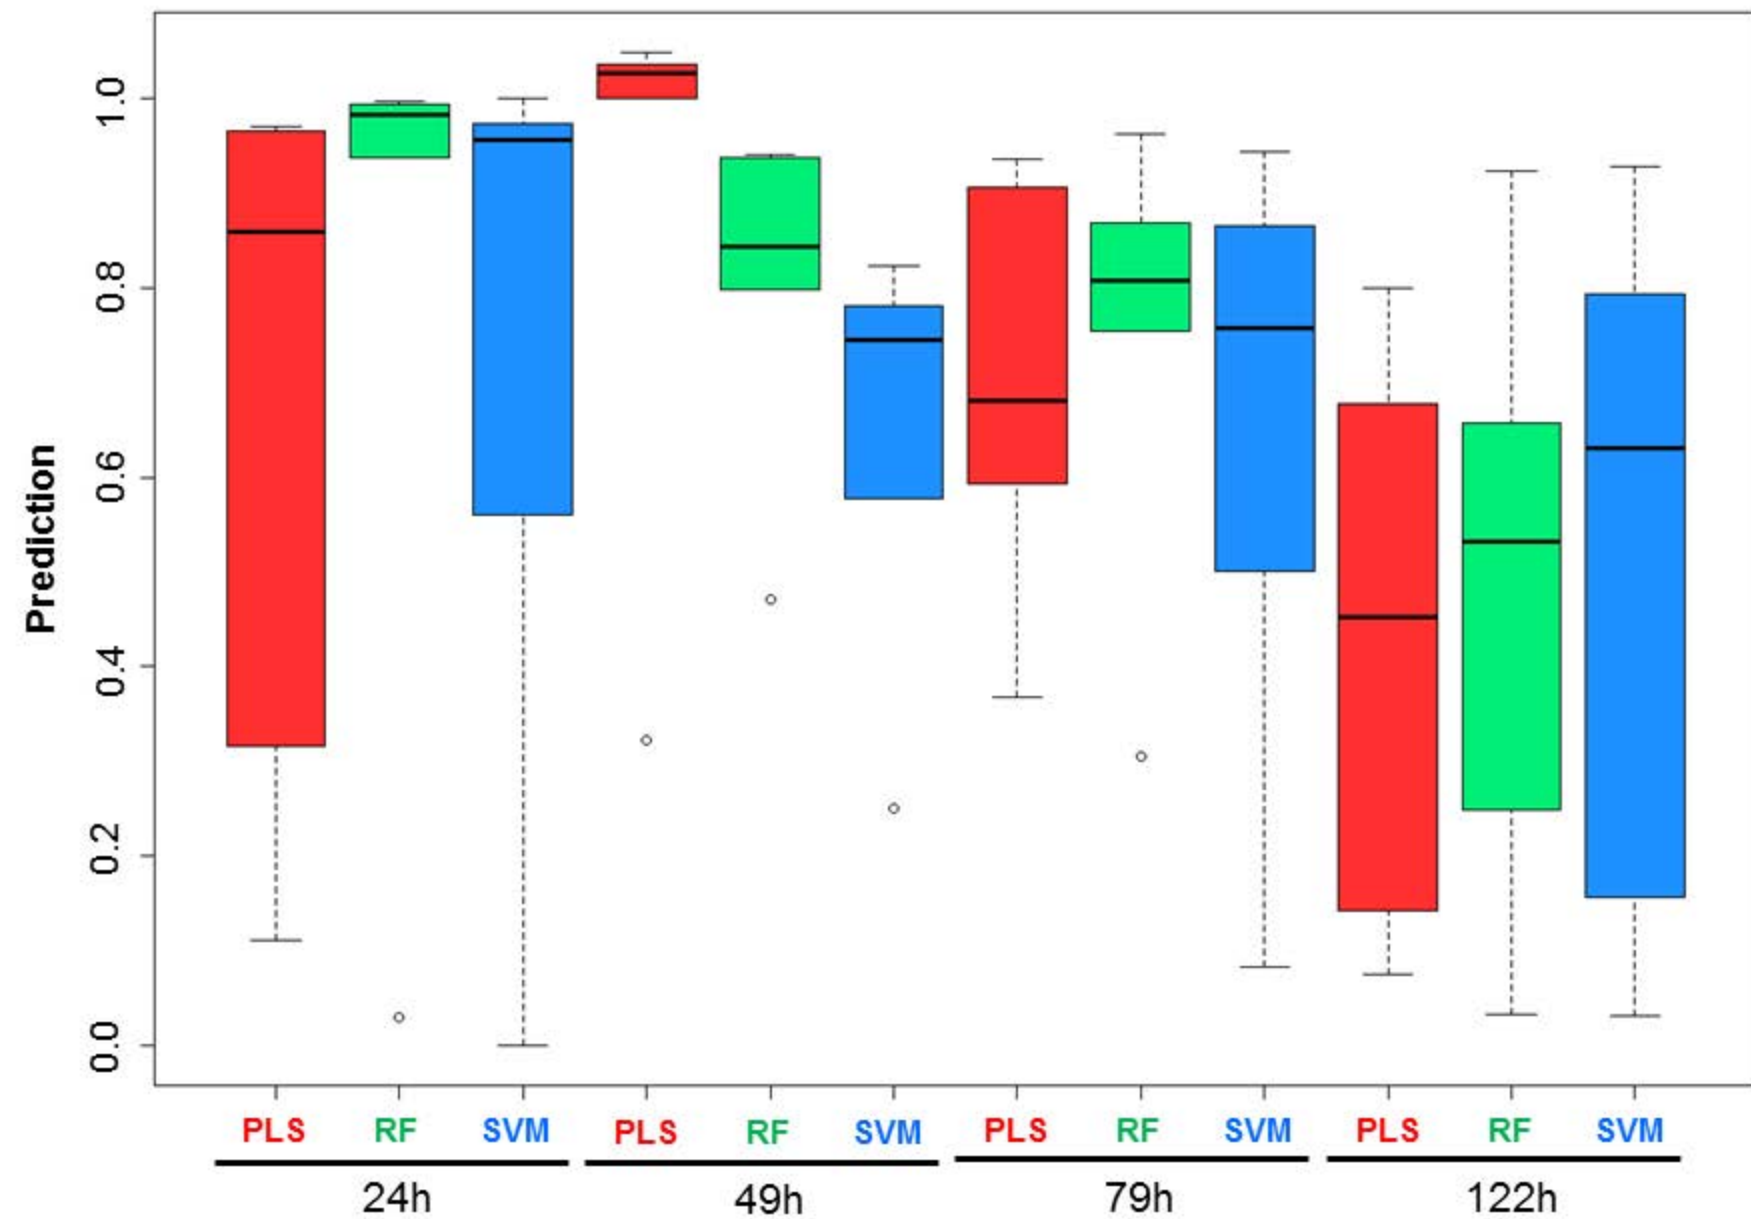

Supplement: NIHMS948306-supplement-JBRaa9eef_Supplementary_information_pdf.pdf [file NIHMS948306-supplement-JBRaa9eef_Supplementary_information_pdf.pdf]
